# Supplementary material for: Escherichia coli, but Not Staphylococcus aureus, Functions as a Chelating Agent That Exhibits Antifungal Activity against the Pathogenic Yeast Candida albicans
Source: MDPI journal article supplement (doi:10.3390/jof9030286), 2023-02-22
Supplement: s1 [file s1]

***Escherichia coli*, but Not *Staphylococcus aureus*, Functions as a Chelating Agent that Exhibits Antifungal Activity against the Pathogenic Yeast *Candida albicans***

Swagata Bose <sup>1,2</sup>, Durg Vijai Singh <sup>3</sup>, Tapan Kumar Adhya <sup>2</sup> and Narottam Acharya<sup>1,\*</sup>

<sup>1</sup>Department of Infectious Disease Biology, Institute of Life Sciences, Bhubaneswar-751023, India.

<sup>2</sup>KIIT School of Biotechnology, Bhubaneswar-751021, India.

<sup>3</sup>Department of Biotechnology, School of Earth, Biological and Environmental Sciences, Central University of South Bihar, Gaya- 824236, India.

\*Correspondence to:

Narottam Acharya, Phone: 91-674-2304278, Fax: 91-674-230 0728

E-mail: [narottam\\_acharya@ils.res.in](mailto:narottam_acharya@ils.res.in); [narottam74@gmail.com](mailto:narottam74@gmail.com)

Running title: Regulation of polymicrobial interaction

**Keywords:** Candidiasis, Morphogenesis, nutritional immunity, peptidoglycan, biofilm, pathogenesis, quorum sensing, divalent metals,

**Figure S1 Bacterial biofilm estimation and CLSM.** (A) Biofilm of *Sa* pure culture and co-culture with 5% of *Ca* and *Ec* culture filtrates; (B) quantification of *Sa* biofilm in the presence of 5%, 25%, and 50% of *Ca* and *Ec* culture filtrates. Similarly, (C) Biofilm of *Ec* pure culture and co-culture with 5% of *Ca* and *Sa* culture filtrates. (D) *Ec* biofilm estimation in the presence of 5%, 25%, and 50% of *Ca* and *Sa* filtrates. Graph plotted using Graph Pad Prism 8.0. (E, F) For CLSM, the bacterial biofilm matrices were grown in the 8-well chambered slides and visualized under 40x Leica TCS SP5 confocal scanning microscope. Mean values from three independent experiments are shown, and error bars represent the SEM. P-value <0.05; \*\*\*\*: P-value <0.0001 (significant) and ns: >0.05 (non-significant).

**Figure S2 Quantification of Mg<sup>2+</sup> ions.** Threshold concentration of divalent ions estimated using different range of Mg<sup>2+</sup> ion concentrations ranging between 62.5μM to 0.24μM on pre-formed *Ca* biofilm. The graph was plotted using Graph Pad Prism 8.0. Mean values from three independent experiments are shown, and error bars represent the SEM. P-value <0.05; \*\*\*\*: P-value <0.0001 (significant) and ns: >0.05 (non-significant).

**Figure S3 Morphology assessment of *C. albicans* filamentation-defective mutants in the presence of serum.** *C. albicans* strains (WT, HLC52, HLC54, and JKC19) were grown in YPD media without and with 10% FBS serum at 30°C with continuous shaking, the morphology imaged at 30mins (A), and at 3hrs time interval (B). The imaging was carried under 40x microscope (Leica DM500).

**Table S1: Primers used during RT-PCR and Semi-quantitative analyses.** Sequences of primers and cyclic conditions used for amplification of *C. albicans* genes used in this study were given.

| Targets      | Sequences (5'-3')                                                    | Cyclic conditions                                                      | Amplicon size (bp) |
|--------------|----------------------------------------------------------------------|------------------------------------------------------------------------|--------------------|
| <b>GAPDH</b> | (Fp) GACCGTTGACGGTCCATCC<br>(Rp) CATCGGTGGTTGGGACTC                  | D at 95°C for 15"<br>A at 52°C for 30"<br>E at 72°C for 30" } 30cycles | 161                |
| <b>ALS3</b>  | (Fp) CGGTTGCGACTGCAAAGA C<br>(Rp) GACCAACCCAAAACAGCATTCC             | D at 95°C for 15"<br>A at 55°C for 30"<br>E at 72°C for 30" } 30cycles | 127                |
| <b>HWPI</b>  | (Fp) CAGTTCCACTCATGCAACCATC<br>(Rp) GCAATACCAATAATAGCAGCACCG         | D at 95°C for 15"<br>A at 55°C for 30"<br>E at 72°C for 30" } 30cycles | 115                |
| <b>ERG11</b> | (Fp) TTACCTCATTATTGGAGACGTGATG<br>(Rp) CACGTTCTCTTCTCAGTTTAATTTCTTTC | D at 95°C for 15"<br>A at 52°C for 30"<br>E at 72°C for 30" } 30cycles | 85                 |
| <b>ERG3</b>  | (Fp) TCCAGTTGATGGGTTCTTCC<br>(Rp) GGACAGTGTGACAAGCGG                 | D at 95°C for 15"<br>A at 55°C for 30"<br>E at 72°C for 30" } 30cycles | 179                |
| <b>SAP3</b>  | (Fp) GTTACTGGTCCCCAAGGTG<br>(Rp) CTTGTCCTTGACCAGCTTGAC               | D at 95°C for 15"<br>A at 55°C for 30"<br>E at 72°C for 30" } 30cycles | 208                |
| <b>EFG1</b>  | (Fp) CCAGGGTGGTGCTGCTAATAG<br>(Rp) GGGTGAAGGGTGAAGTGAACC             | D at 95°C for 15"<br>A at 55°C for 30" } 30cycles                      | 241                |

|                    |                                                        |                                                                        |     |
|--------------------|--------------------------------------------------------|------------------------------------------------------------------------|-----|
|                    |                                                        | E at 72°C for 30"                                                      |     |
| <b><i>CPHI</i></b> | (Fp) GACGCTTCTGGGTTT CC<br>(Rp) ATCCCATGGCAATTTGTTG    | D at 95°C for 15"<br>A at 54°C for 30"<br>E at 72°C for 30" } 30cycles | 160 |
| <b><i>NRG1</i></b> | (Fp) CACCTCACTTGCAACCCC<br>(Rp) GCCCTGGAGATGGTCTGA     | D at 95°C for 15"<br>A at 55°C for 30"<br>E at 72°C for 30" } 30cycles | 198 |
| <b><i>TUPI</i></b> | (Fp) CTCTTGGCGACAGGTGCAG<br>(Rp) GTGGTGACGCCGTCTTCGA   | D at 95°C for 15"<br>A at 55°C for 30"<br>E at 72°C for 30" } 30cycles | 224 |
| <b><i>ECE1</i></b> | (Fp) GAGATGGCGTTCCAGATGTT<br>(Rp) CCGGCATCTCTTTTAACTGG | D at 95°C for 15"<br>A at 55°C for 30"<br>E at 72°C for 30" } 30cycles | 214 |

**A**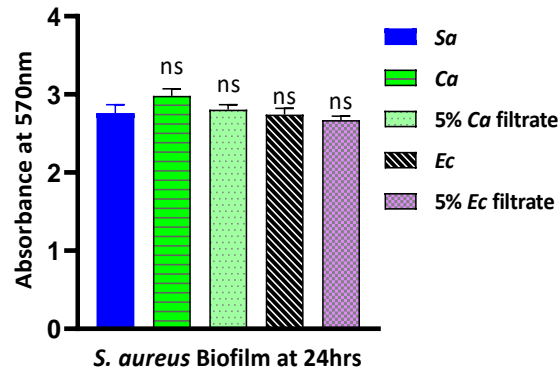**C**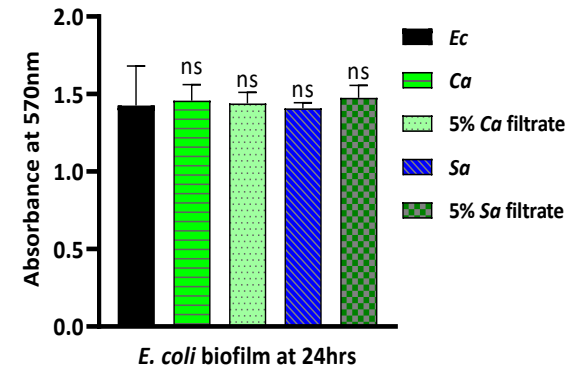**B**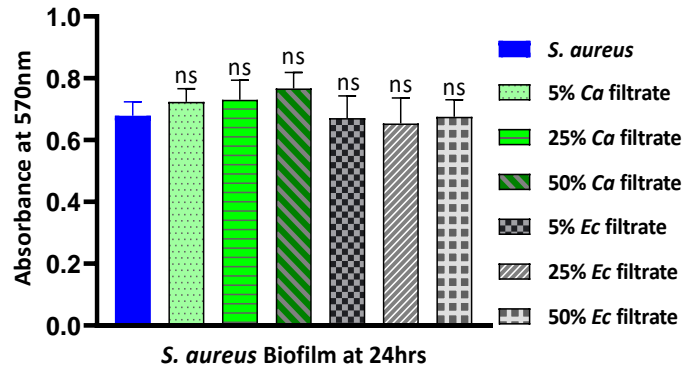**D**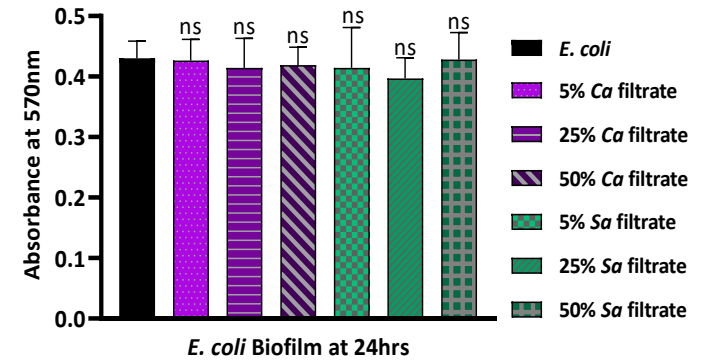**E**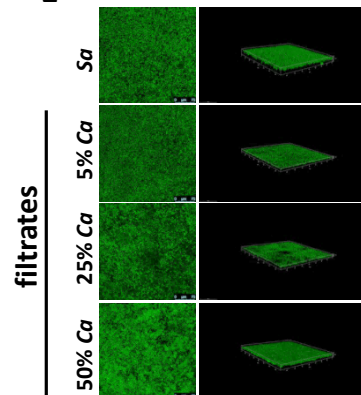**F**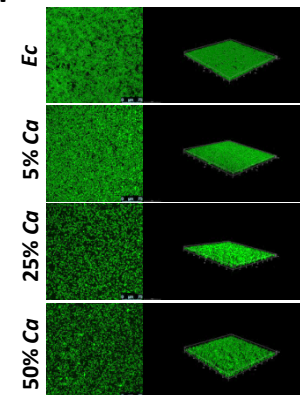**Figure S1**

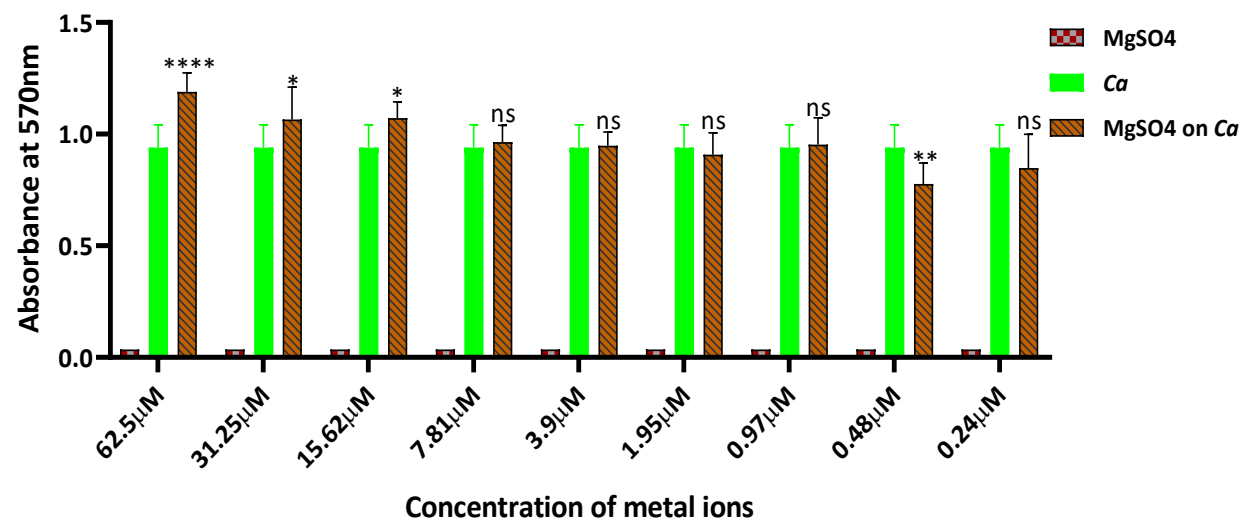

Figure S2

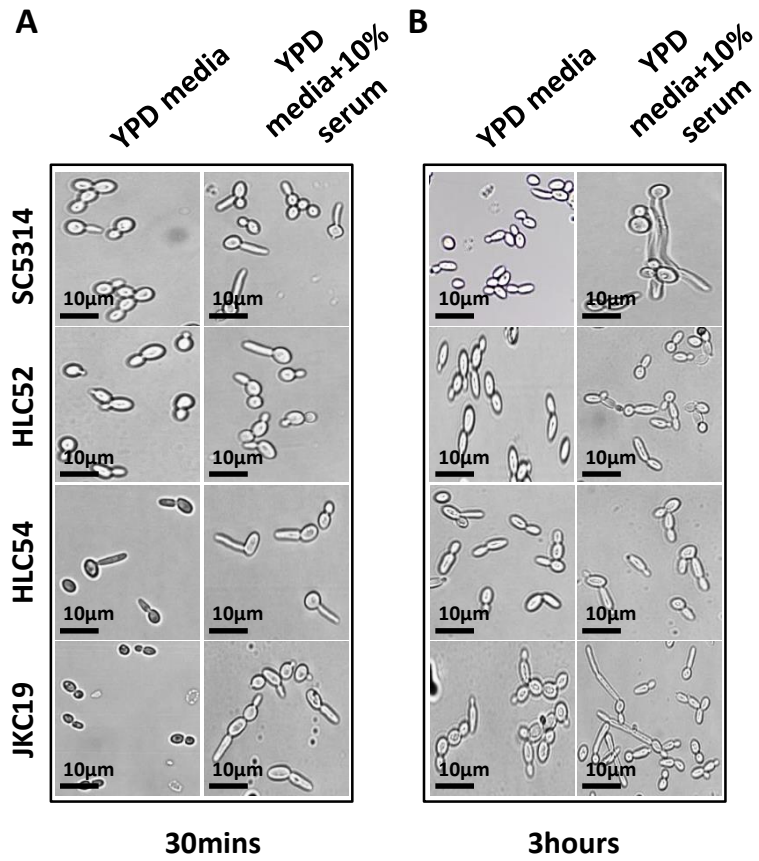

**Figure S3**
